# Supplementary material for: Direct observation of the in-plane crack formation of O3-Na0.8Mg0.2Fe0.4Mn0.4O2 due to oxygen gas evolution for Na-ion batteries
Source: Royal Society of Chemistry journal article supplement (doi:10.1039/d1ta02639a), 2021-01-01
Supplement: d1ta02639a1.pdf [file d1ta02639a1.pdf]

## Supplementary Information

### **Direct observation of the in-plane crack formation of O3- Na<sub>0.8</sub>Mg<sub>0.2</sub>Fe<sub>0.4</sub>Mn<sub>0.4</sub>O<sub>2</sub> due to oxygen gas evolution for Na-ion batteries**

Suyeon Lee,<sup>a</sup> Sung Wook Doo,<sup>a</sup> Min Soo Jung,<sup>a</sup> Shin Gwon Lim,<sup>a</sup> Kanghyeon Kim<sup>a</sup> and Kyu Tae Lee\*<sup>a</sup>

<sup>a</sup>School of Chemical and Biological Engineering, Institute of Chemical Processes, Seoul National University, 1 Gwanak-ro, Gwanak-gu, Seoul, Republic of Korea.

\*Corresponding author: ktleee@snu.ac.kr

**Table S1.** Lattice parameters of  $\text{Na}_{0.8}\text{Mg}_{0.2}\text{Fe}_{0.4}\text{Mn}_{0.4}\text{O}_2$  under various conditions.

|                                                                                                                          | a axis (Å)   | c axis (Å)   | Volume (Å <sup>3</sup> ) |
|--------------------------------------------------------------------------------------------------------------------------|--------------|--------------|--------------------------|
| As-prepared $\text{Na}_{0.8}\text{Mg}_{0.2}\text{Fe}_{0.4}\text{Mn}_{0.4}\text{O}_2$<br>(Fig. S1)                        | 2.960628(60) | 16.45053(69) | 124.8758(73)             |
| $\text{Na}_{0.8}\text{Mg}_{0.2}\text{Fe}_{0.4}\text{Mn}_{0.4}\text{O}_2$<br>after storage in air (Fig. S6a)              | 2.95090(13)  | 16.3982(20)  | 123.662(19)              |
| PDMS-coated $\text{Na}_{0.8}\text{Mg}_{0.2}\text{Fe}_{0.4}\text{Mn}_{0.4}\text{O}_2$<br>after storage in air (Fig. S6b)  | 2.95081(11)  | 16.4258(13)  | 123.862(14)              |
| $\text{Na}_{0.8}\text{Mg}_{0.2}\text{Fe}_{0.4}\text{Mn}_{0.4}\text{O}_2$<br>after storage in dry $\text{CO}_2$ (Fig. 7a) | 2.94921(11)  | 16.4320(15)  | 123.775(15)              |
| $\text{Na}_{0.8}\text{Mg}_{0.2}\text{Fe}_{0.4}\text{Mn}_{0.4}\text{O}_2$<br>after storage in wet Ar (Fig. 7a)            | 2.94800(12)  | 16.4268(15)  | 123.634(15)              |

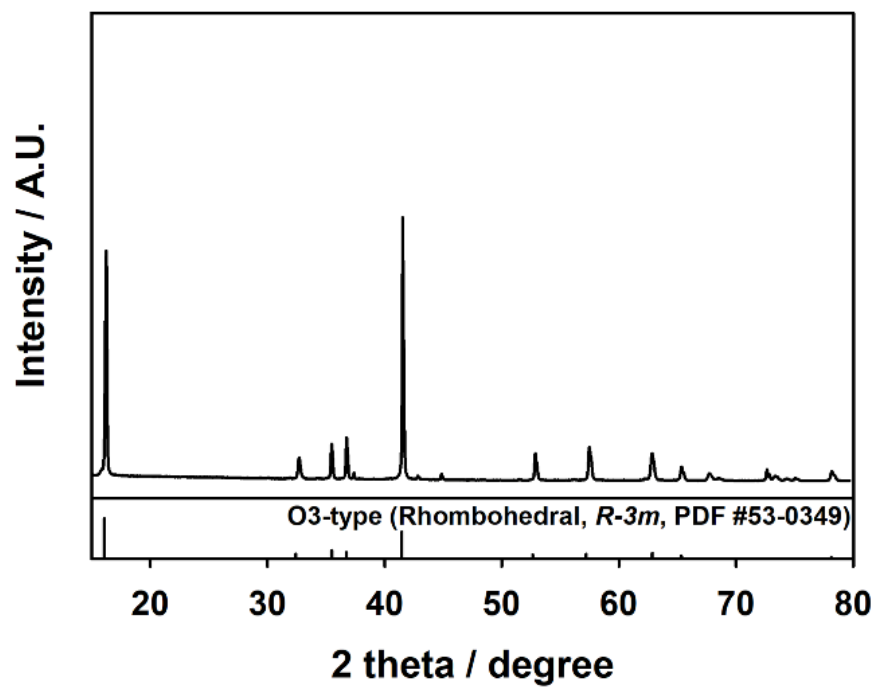

Fig. S1 XRD pattern of  $\text{Na}_{0.8}\text{Mg}_{0.2}\text{Fe}_{0.4}\text{Mn}_{0.4}\text{O}_2$  powders.

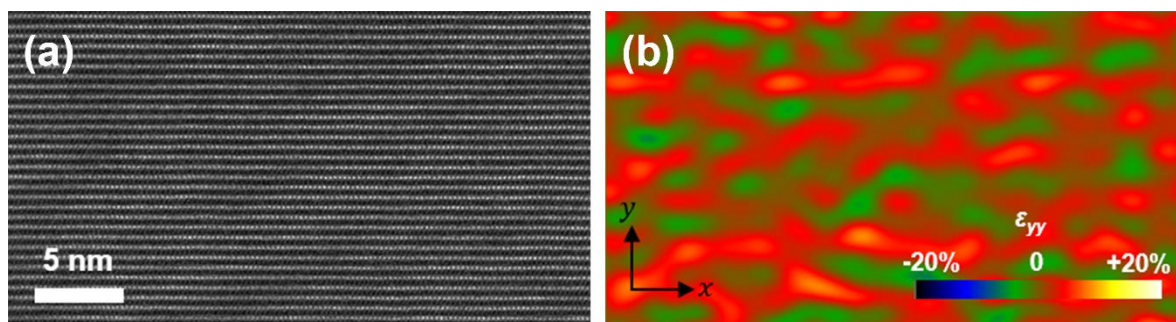

**Fig. S2** (a) HAADF-STEM image of bare  $\text{Na}_{0.8}\text{Mg}_{0.2}\text{Fe}_{0.4}\text{Mn}_{0.4}\text{O}_2$  particles before storage and (b) the corresponding two-dimensional strain map using GPA.

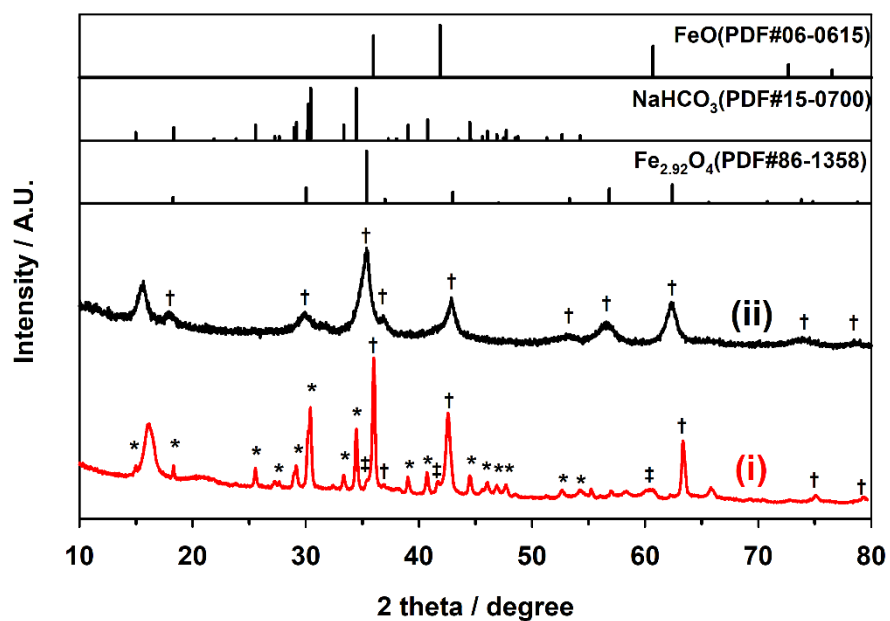

**Fig. S3** XRD patterns of  $\text{Na}_{0.8}\text{Mg}_{0.2}\text{Fe}_{0.4}\text{Mn}_{0.4}\text{O}_2$  powders after storage in wet  $\text{CO}_2$  (i) without and (ii) with heating at  $500\text{ }^\circ\text{C}$  in  $\text{N}_2$  atmosphere.  $\text{Na}_{0.8}\text{Mg}_{0.2}\text{Fe}_{0.4}\text{Mn}_{0.4}\text{O}_2$  powders were washed with deionized water to remove residual sodium compounds before heat treatment. (FeO: double dagger,  $\text{Fe}_{2.92}\text{O}_4$ : dagger, and  $\text{NaHCO}_3$ : asterisk)

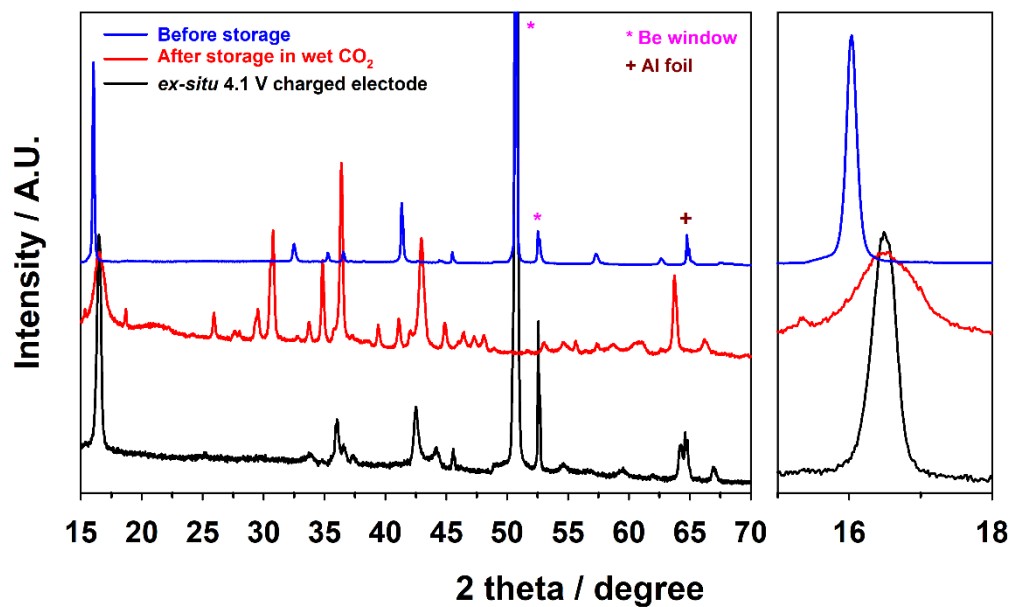

**Fig. S4** XRD patterns of  $\text{Na}_{0.8}\text{Mg}_{0.2}\text{Fe}_{0.4}\text{Mn}_{0.4}\text{O}_2$  electrode after charging at 4.1 V (vs.  $\text{Na}/\text{Na}^+$ ) and  $\text{Na}_{0.8}\text{Mg}_{0.2}\text{Fe}_{0.4}\text{Mn}_{0.4}\text{O}_2$  powders before and after storage in wet  $\text{CO}_2$ .

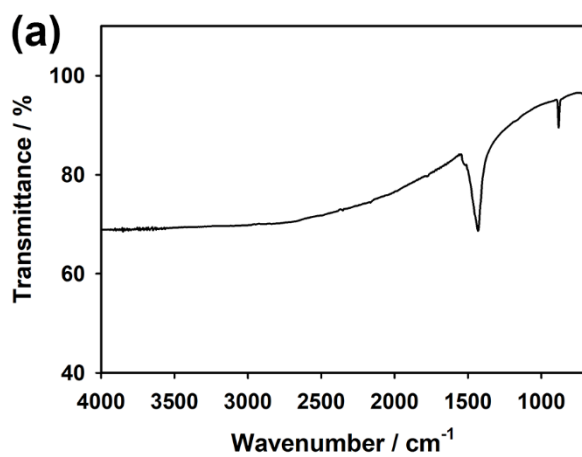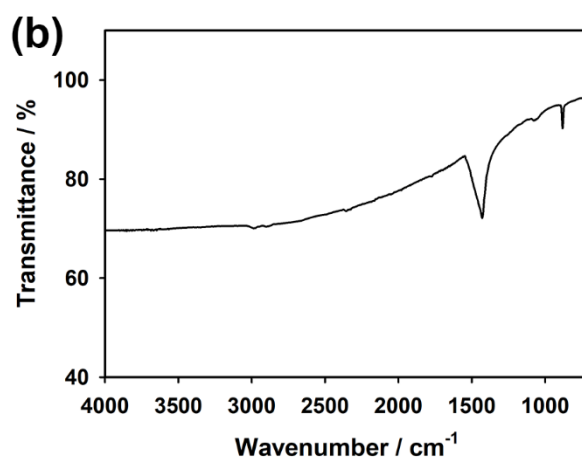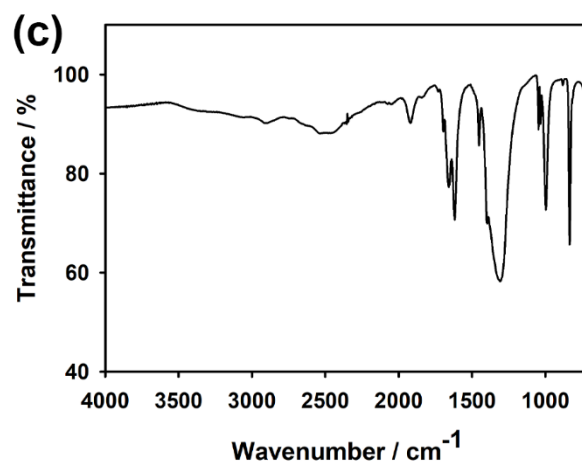

**Fig. S5** FT-IR spectra of  $\text{Na}_{0.8}\text{Mg}_{0.2}\text{Fe}_{0.4}\text{Mn}_{0.4}\text{O}_2$  after storage (a) in dry  $\text{CO}_2$ , (b) in wet Ar and (c) in wet  $\text{CO}_2$  for 1 day.

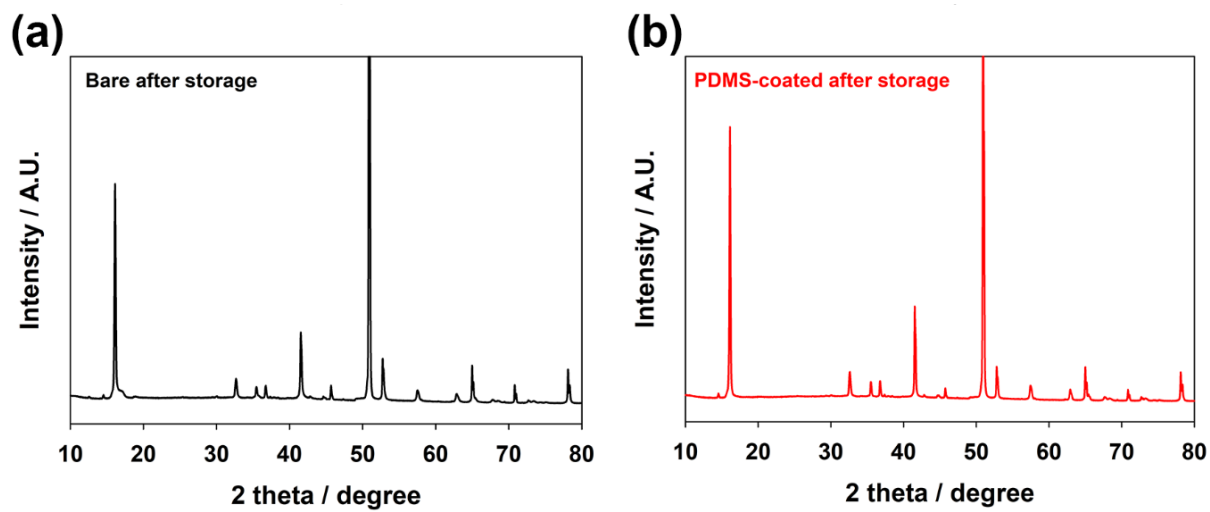

**Fig. S6** XRD patterns of (a) bare and (b) PDMS-coated  $\text{Na}_{0.8}\text{Mg}_{0.2}\text{Fe}_{0.4}\text{Mn}_{0.4}\text{O}_2$  electrodes after storage in air at a RH of 50% and 25 °C for 2 weeks.



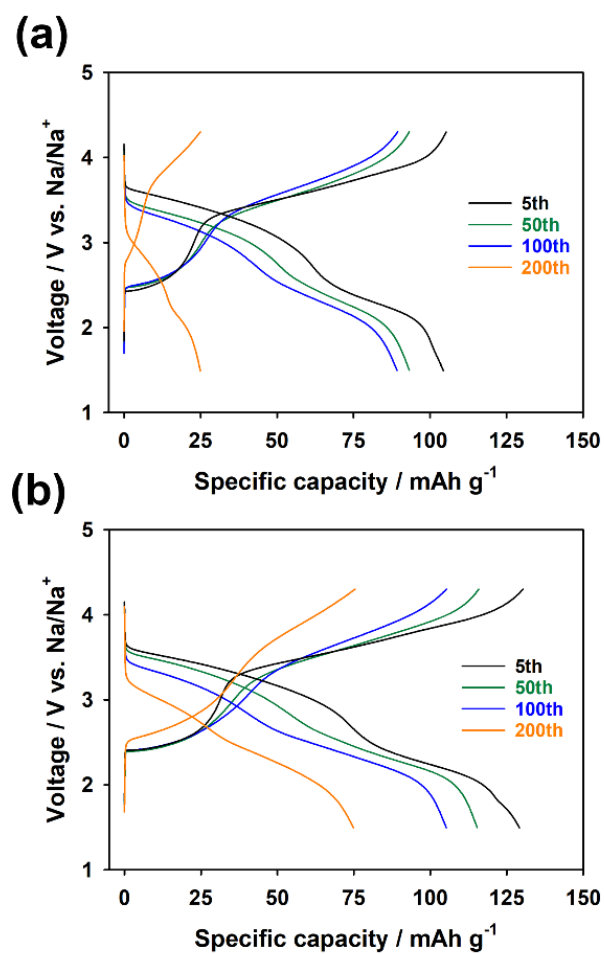

**Fig. S7** Voltage profiles of (a) bare and (b) PDMS-coated  $\text{Na}_{0.8}\text{Mg}_{0.2}\text{Fe}_{0.4}\text{Mn}_{0.4}\text{O}_2$  electrodes after storage in air at a RH of 50% and 25 °C for 2 weeks at 0.5 C-rate ( $90 \text{ mA g}^{-1}$ ) for various cycle numbers.

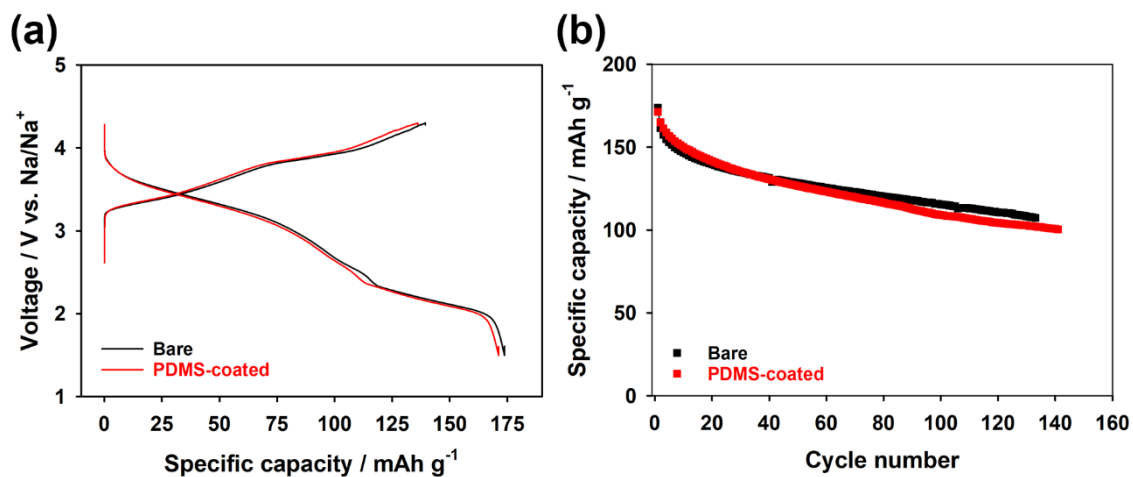

**Fig. S8** (a) Voltage profiles of bare and PDMS-coated  $\text{Na}_{0.8}\text{Mg}_{0.2}\text{Fe}_{0.4}\text{Mn}_{0.4}\text{O}_2$  without air exposure for the first cycle at a 0.1 C-rate (18 mA g<sup>-1</sup>). (b) Cycle performances of bare and PDMS-coated  $\text{Na}_{0.8}\text{Mg}_{0.2}\text{Fe}_{0.4}\text{Mn}_{0.4}\text{O}_2$  without air exposure at a 0.1 C-rate (18 mA g<sup>-1</sup>).
